# Supplementary material for: Dissolving porcine and human microthrombi by short exposure to microdoses of alteplase in an in vitro model of microvascular obstruction
Source: Springer Nature journal article supplement (doi:10.1038/s41598-025-03060-1), 2025-05-24
Supplement: MOESM1 [file 41598_2025_3060_MOESM1_ESM.pdf]

## **Supplementary Material**

### **Dissolving porcine and human microthrombi by short exposure to microdoses of alteplase in an in vitro model of microvascular obstruction**

Anastasia Milusev<sup>1</sup>, PhD; Yannick Rösch<sup>1</sup>, PhD; Yves Kuster<sup>2</sup>; Petra Wolint<sup>3</sup>; Jens Ulmer<sup>2</sup>, PhD; Miriam Weisskopf<sup>4</sup>, DVM; Nikola Cesarovic<sup>2, 5</sup>, PhD; Dominik Obrist<sup>1</sup>, PhD

<sup>1</sup> ARTORG Center for Biomedical Engineering Research, University of Bern, Switzerland

<sup>2</sup> Institute for Microtechnology and Photonics, OST University of Applied Sciences, Buchs SG, Switzerland

<sup>3</sup> Department of Health Sciences and Technology, Swiss Federal Institute of Technology, Zurich, Switzerland

<sup>4</sup> Center for Surgical Research, University Hospital Zurich, University of Zurich, Switzerland

<sup>5</sup> Department of Cardiothoracic and Vascular Surgery, German Heart Center Berlin, Berlin, Germany

| A | Alteplase microdose | Slope of clot dissolution |                     |         |
|---|---------------------|---------------------------|---------------------|---------|
|   |                     | CoFI                      | CoFI + IV alteplase | p-value |
|   | Control             | 0.0023 ± 0.00027          | 0.0035 ± 0.00037    | <0.0001 |
|   | 0.3 mg              | 0.013 ± 0.00085           | 0.02 ± 0.00062      | <0.0001 |
|   | 0.6 mg              | 0.014 ± 0.00056           | 0.019 ± 0.00048     | 0.85    |
|   | 0.9 mg              | 0.021 ± 0.00070           | 0.028 ± 0.00051     | 0.0162  |
|   | 1.5 mg              | 0.034 ± 0.00075           | 0.046 ± 0.00083     | <0.0001 |

| B | Alteplase microdose | Slope of clot dissolution |                     |         |
|---|---------------------|---------------------------|---------------------|---------|
|   |                     | CoFI                      | CoFI + IV alteplase | p-value |
|   | Control             | 0.013 ± 0.00048           | 0.052 ± 0.000955    | <0.0001 |
|   | 0.075 mg            | 0.03 ± 0.00095            | 0.04 ± 0.00085      | <0.0001 |
|   | 0.3 mg              | 0.032 ± 0.00102           | 0.04 ± 0.00095      | 0.0001  |
|   | 0.6 mg              | 0.03 ± 0.00074            | 0.044 ± 0.00111     | 0.0203  |
|   | 1.5 mg              | 0.035 ± 0.0013            | 0.041 ± 0.0012      | <0.0001 |

**Supplementary Table S1: Slope of thrombolysis for porcine and human microthrombi over time.** Slope of thrombolysis was calculated from lysis over time curves for **(A)** porcine microthrombi and **(B)** human microthrombi incubated with four different microdoses of alteplase or without alteplase (Control). Slopes for controlled flow infusion (CoFI) are compared to the combined approach (CoFI + IV dose). Values for slope steepness and standard deviation are shown. Data are from six to eight independent experiments and five to six different blood donors. Unpaired Student's t-test was used for statistical analysis and  $p < 0.05$  was considered significant.

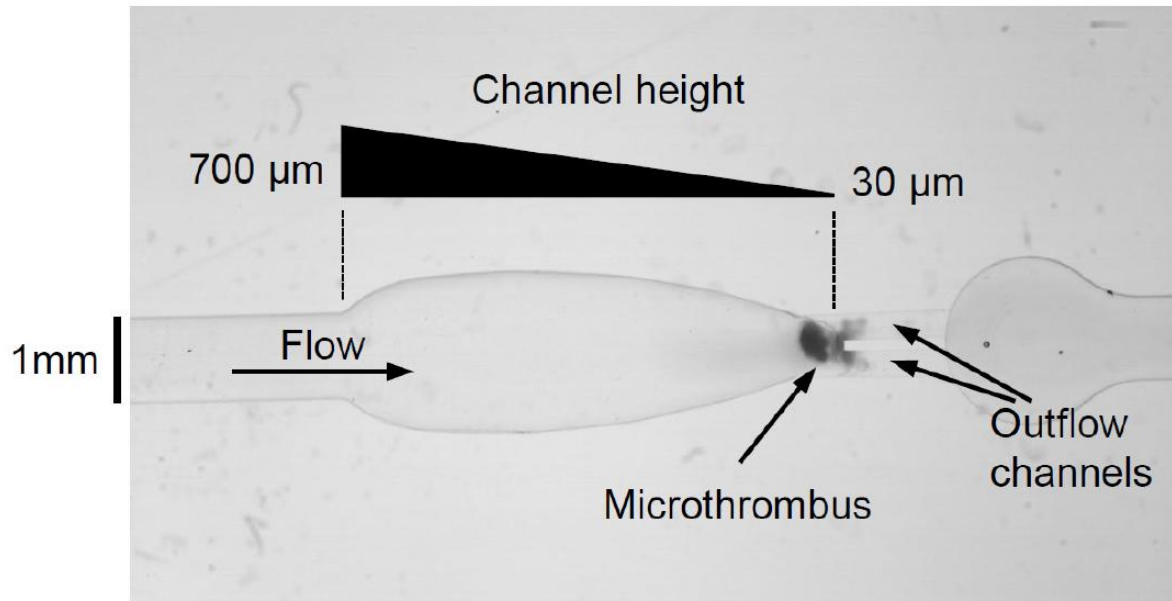

**Supplementary Figure S1: Microfluidic chip design to model microvascular obstruction in vitro.** Image of the microfluidic chip with a chamber of tapered height (channel height 700  $\mu\text{m}$  – 30  $\mu\text{m}$ ) in which a microthrombus is trapped. Two outflow channels (300  $\mu\text{m}$  wide and 30  $\mu\text{m}$  high) assure continuous perfusion without complete channel occlusion after MT injection. Upon perfusion, flow occurs from left to right and is maintained at a constant flow rate of 37  $\mu\text{l}/\text{min}$  using a syringe pump.

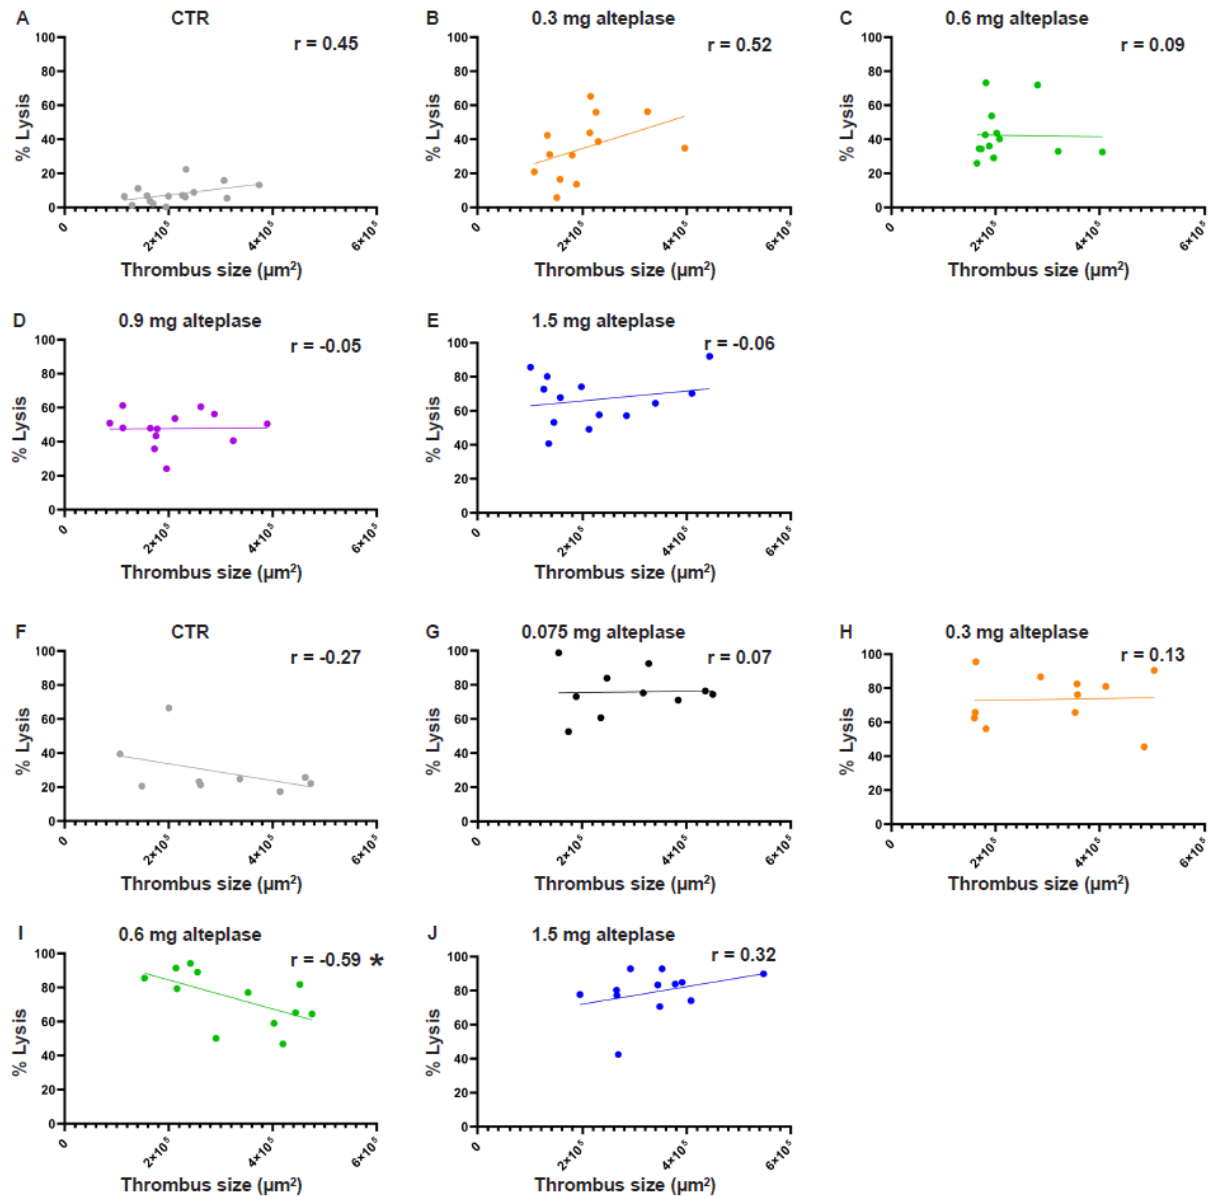

**Supplementary Figure S2: Relationship between initial thrombus size and microthrombus lysis.** (A-E) porcine MT and (F-J) human MT are plotted according to the MT size in  $\mu\text{m}^2$ , and the corresponding MT lysis achieved at the end of lysis experiments. Linear regression analysis and nonparametric correlation test (Spearman  $r$ ) was used to determine whether initial MT size had an influence on the amount of lysis for all tested alteplase microdoses as well as controls (not treated with alteplase).  $p < 0.05$  was considered significant.

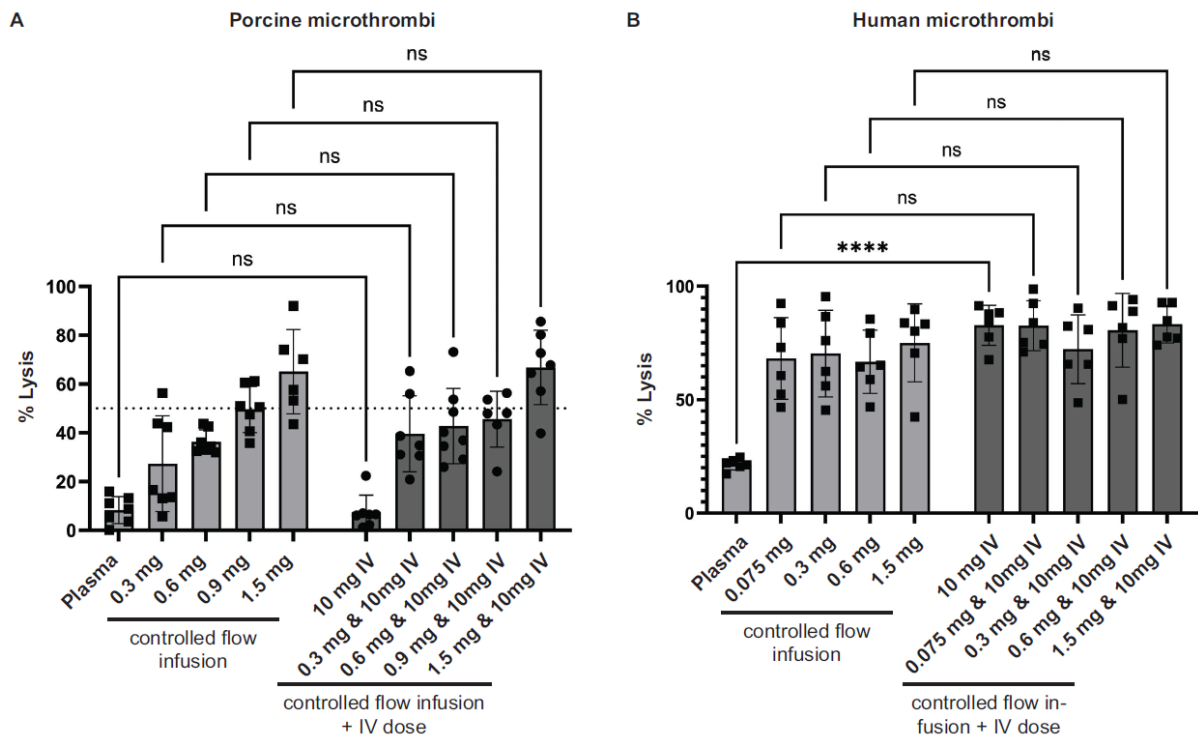

**Supplementary Figure S3: MT lysis comparing CoFI to a combined approach.** MT lysis after 25 minutes perfusion with citrate plasma (light grey bars) or citrate plasma containing 2  $\mu$ g/ml alteplase (dark grey bars) for porcine (**A**) or human (**B**) MT. Two-way ANOVA with multiple comparisons was used for statistical analysis. Data are from six to eight independent experiments and five to six different blood donors. \*\*\*\*  $p < 0.001$

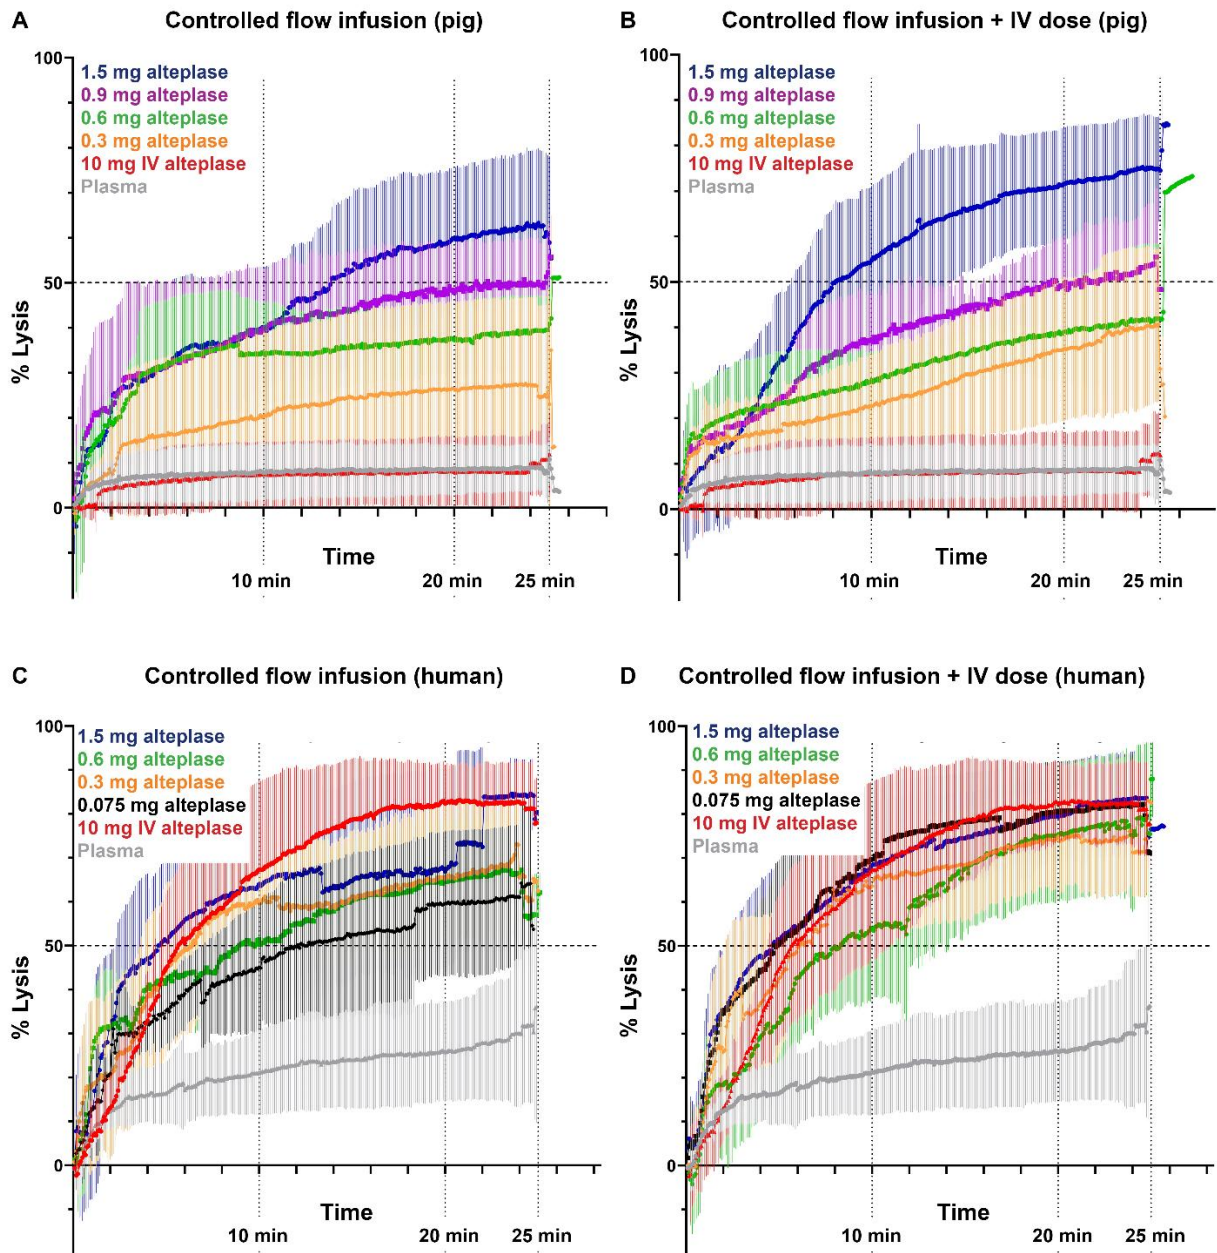

**Supplementary Figure S4: Standard deviation of thrombolysis of MT over time comparing controlled flow infusion to a combined approach (CoFI + IV dose). (B, C) Thrombolysis over time for (A, B) porcine or (C, D) human MT treated with different alteplase microdoses and perfused with (A, C) plasma or (B, D) plasma containing 2  $\mu\text{g}/\text{ml}$  alteplase. Each curve represents the mean lysis over time of at least 6 independent experiments with the corresponding standard deviation.**
